# Supplementary material
Source: PubMed Central journal article supplement (PMC4252804)
Supplement: NIHMS616797-supplement-supplement_1.pdf [file NIHMS616797-supplement-supplement_1.pdf]

**Supplementary Table 1.** Live birth rate per couple stratified by day 3 FSH and E2 concentrations for COH-IUI and IVF cycles with and without age

| Treatment Cycle in which Live Birth Resulted                        | FSH (mIU/mL)<br>E2 (pg/mL)             | Age (years)   |              |              |              | All ages combined | P-value <sup>b</sup> |
|---------------------------------------------------------------------|----------------------------------------|---------------|--------------|--------------|--------------|-------------------|----------------------|
|                                                                     |                                        | <35           | 35-37.9      | 38-39.9      | ≥40          |                   |                      |
| COH-IUI <sup>a</sup><br>Live birth rate<br>(live births/couple [%]) | <b>Group 1A</b><br>FSH <10<br>E2 <40   | 44/150 (29.3) | 20/50 (40.0) | 7/37 (18.9)  | 3/31 (9.7)   | 74/268 (27.6)     | .01                  |
|                                                                     | <b>Group 1B</b><br>FSH <10<br>E2 ≥40   | 30/127 (23.6) | 11/49 (22.5) | 5/32 (15.6)  | 2/25 (8.0)   | 48/233 (20.6)     |                      |
|                                                                     | <b>Group 2A</b><br>FSH 10-15<br>E2 <40 | 3/11 (27.3)   | 2/8 (25.0)   | 3/3 (100.0)  | 0/8 (0)      | 8/30 (26.6)       |                      |
|                                                                     | <b>Group 2B</b><br>FSH 10-15<br>E2 ≥40 | 0/7 (0)       | 0/3 (0)      | 0/3 (0)      | 0/6 (0)      | 0/19 (0)          |                      |
| IVF<br>Live birth rate<br>(live births/couple [%])                  | <b>Group 1A</b><br>FSH <10<br>E2 <40   | 50/83 (60.2)  | 10/23 (43.5) | 23/34 (67.7) | 15/38 (39.5) | 98/178 (55.1)     | .02                  |
|                                                                     | <b>Group 1B</b><br>FSH <10<br>E2 ≥40   | 39/76 (51.3)  | 21/33 (63.6) | 20/31 (64.5) | 6/31 (19.4)  | 86/171 (50.3)     |                      |
|                                                                     | <b>Group 2A</b><br>FSH 10-15<br>E2 <40 | 1/7 (14.3)    | 2/3 (66.7)   | 0/1 (0)      | 2/11 (18.2)  | 5/22 (22.7)       |                      |
|                                                                     | <b>Group 2B</b><br>FSH 10-15<br>E2 ≥40 | 3/7 (42.9)    | 1/2 (50.0)   | 2/3 (66.7)   | 0/6 (0)      | 6/18 (33.3)       |                      |

<sup>a</sup> COH-IUI=intrauterine insemination following stimulation with clomiphene citrate or exogenous gonadotropins

<sup>b</sup> Fisher's exact test for comparison of live birth rates by the four FSH and E2 groups without age stratification
